# Supplementary material for: Fabrication of silicon-vacancy color centers in diamond films: tetramethylsilane as a new dopant source
Source: Royal Society of Chemistry journal article supplement (doi:10.1039/c7ce02181j), 2018-01-01
Supplement: c7ce02181j1.pdf [file c7ce02181j1.pdf]

## Supporting Information

### **Fabrication of silicon-vacancy color centers in diamond films: tetramethylsilane as a new dopant source**

Bing Yang<sup>a,#</sup>, Junhao Li<sup>a,#</sup>, Liang Guo<sup>b</sup>, Nan Huang<sup>a</sup>, Lusheng Liu<sup>a</sup>, Zhaofeng Zhai<sup>a</sup>,  
Wenjing Long<sup>a</sup>, Xin Jiang<sup>a,c,\*</sup>

<sup>a</sup>Shenyang National Laboratory for Materials Science, Institute of Metal Research (IMR), Chinese Academy of Sciences (CAS), No. 72 Wenhua Road, Shenyang 110016, China

<sup>b</sup>Shenyang Military Region Architectural Design Institute, South Eleventh Road, Shenyang 110000, China

<sup>c</sup>Institute of Materials Engineering, University of Siegen, Paul-Bonatz-Str. 9-11, Siegen 57076, Germany

\*: to whom correspondence should be addressed: [xjiang@imr.ac.cn](mailto:xjiang@imr.ac.cn)

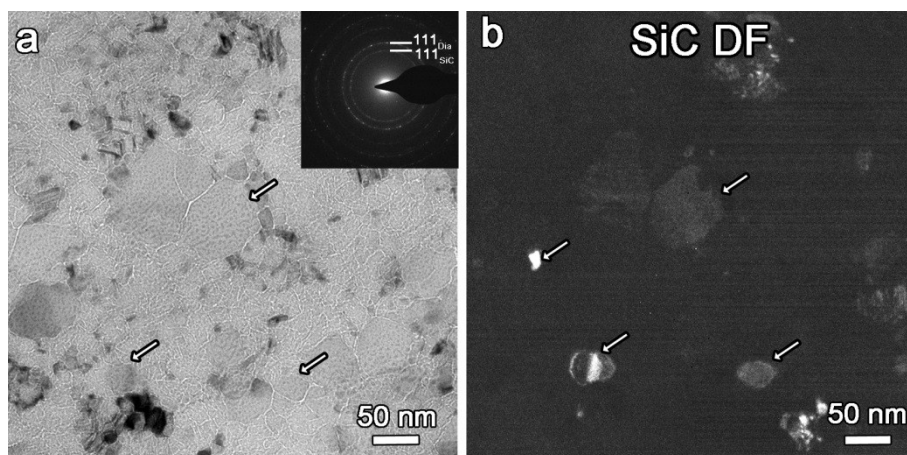

**Figure S1** the TEM bright-field (a) and dark-field (b) images of Si-doped diamond films deposited at the growth temperature of 650 °C with the Si/C ratio of 1/310.

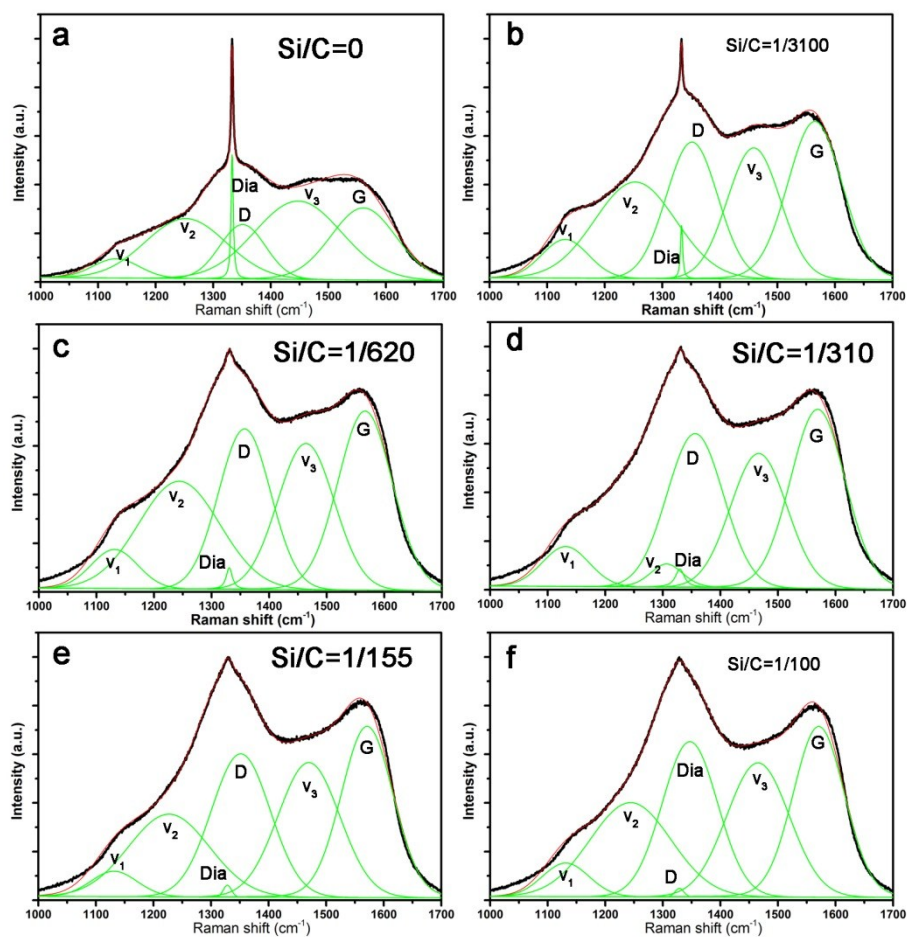

**Figure S2** The deconvolution of Raman spectra of Si-doped diamond films at the growth temperature of 870 °C with different Si/C ratios: (a) 0; (b) 1/3100; (c) 1/620; (d) 1/310; (e) 1/155; (f) 1/100.

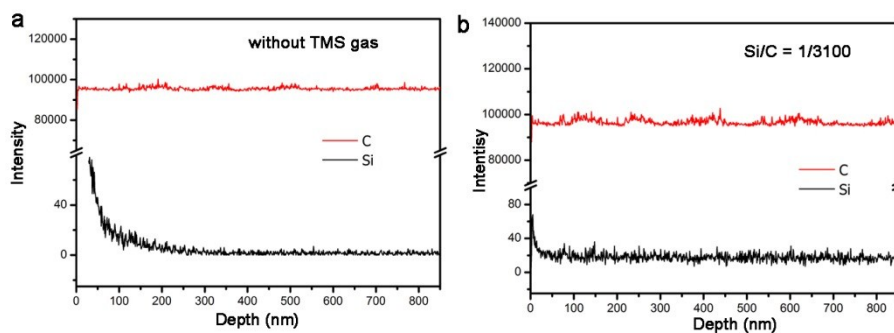

**Figure S3** SIMS depth profiles for diamond films grown at the temperature of 870 °C with different Si/C ratios: (a) 0; (b) 0/3100.

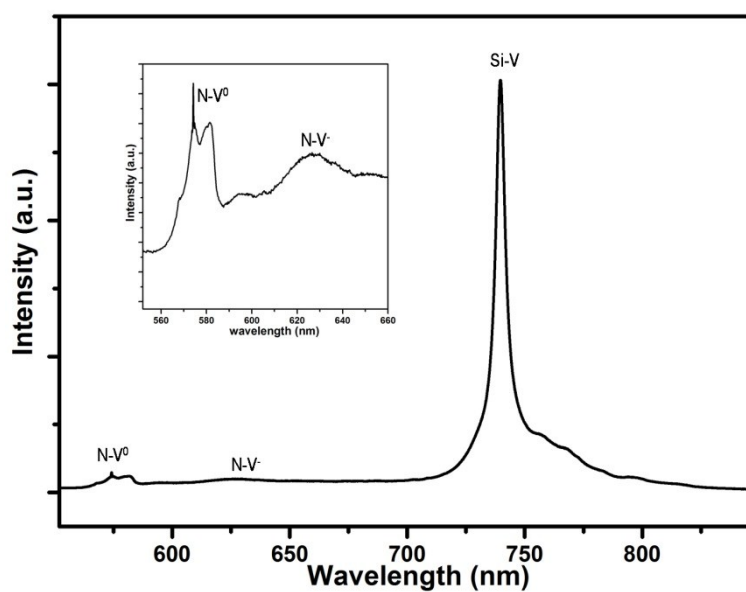

**Figure S4** PL emission spectra of Si-doped diamond films with the Si/C ratio of 1/3100 deposited at the temperature of 870 °C.

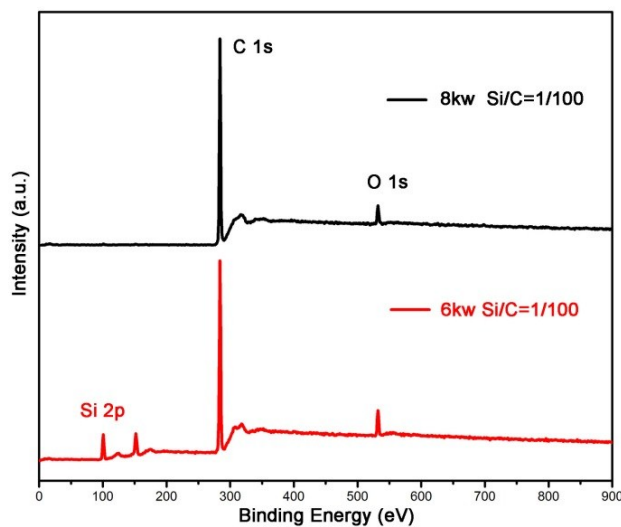

**Figure S5** XPS spectra of the deposited diamond films at the Si/C ratio of 1/100
